# Supplementary material for: Detection and Quantitation of Adulterated Paprika Samples Using Second-Order HPLC-FLD Fingerprints and Chemometrics
Source: Foods. 2022 Aug 8;11(15):2376. doi: 10.3390/foods11152376 (PMC9368040; doi:10.3390/foods11152376)
Supplement: Supplementary file 1 [file foods-11-02376-s001.zip › foods-1818639-SI.pdf]

# Detection and Quantitation of Adulterated Paprika Samples Using Second-Order HPLC–FLD Fingerprints and Chemometrics

Xiaodong Sun <sup>1,2</sup>, Min Zhang <sup>1,2</sup>, Pengjiao Wang <sup>1,2</sup>, Junhua Chen <sup>1,2</sup>, Shengjun Yang <sup>1,2</sup>, Peng Luo <sup>3</sup> and Xiuli Gao <sup>1,2,3,\*</sup>

<sup>1</sup> State Key Laboratory of Functions and Applications of Medicinal Plants, School of Pharmacy, Guizhou Medical University, Guiyang 550025, China; sunxiaodong@gmc.edu.cn (X.-D.S.); minzhang@gmc.edu.cn (M.Z.); wangpengjiao@gmc.edu.cn (P.-J.W.); chenjh@gmc.edu.cn (J.-H.C.); yangshengjun@gmc.edu.cn (S.-J.Y.)

<sup>2</sup> Microbiology and Biochemical Pharmaceutical Engineering Research Center of Guizhou Provincial Department of Education, Guizhou Medical University, Guiyang 550004, China

<sup>3</sup> Guizhou Provincial Engineering Research Center of Food Nutrition and Health, School of Public Health, Guizhou Medical University, Guiyang 550025, China; luopeng@gmc.edu.cn

\* Correspondence: gaoxl@gmc.edu.cn.

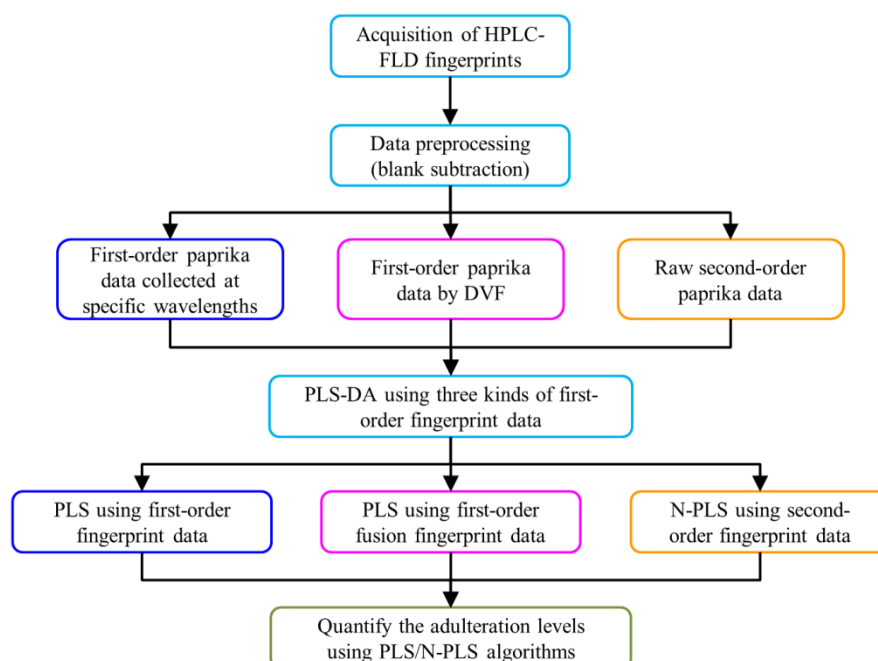

**Figure S1.** The flow chart of the whole experimental steps.

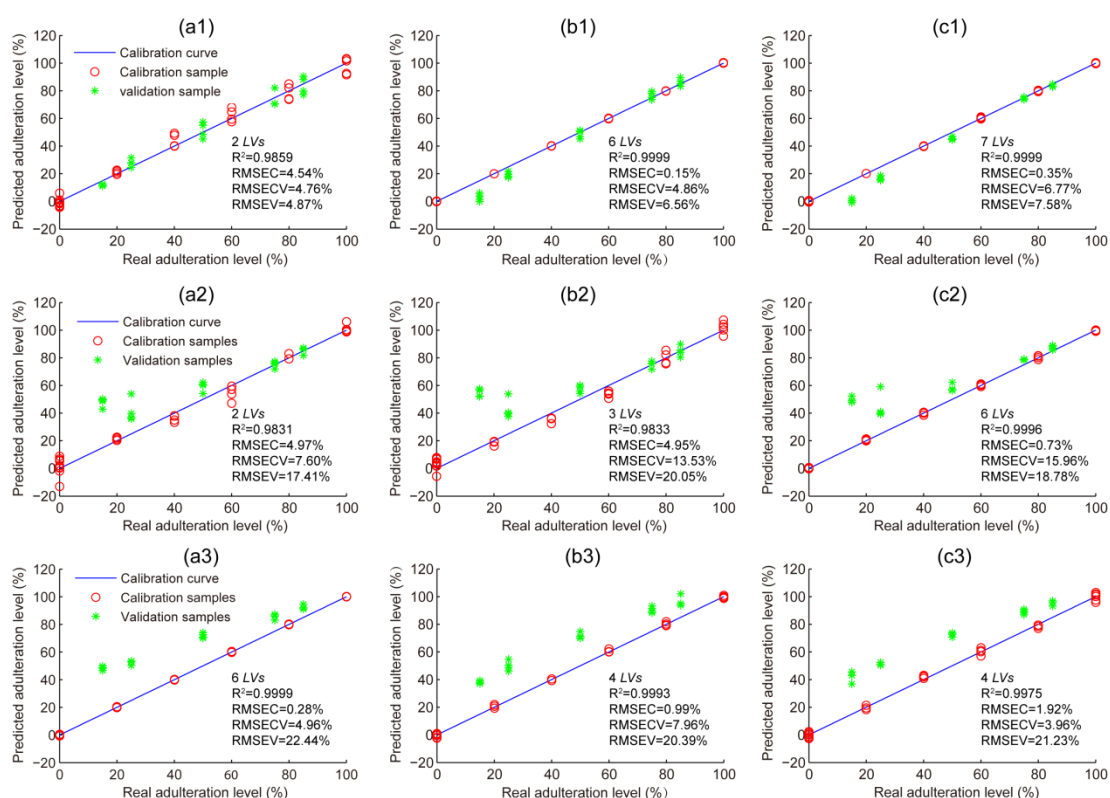

**Figure S2.** The plots of predicted adulteration levels versus real values obtained by PLS regression using first-order data collected at 380 nm (a1-a3), 440 nm (b1-b3) and first-order fusion data (c1-c3) in case1 (a1-c1), case 2 (a2-c2) and case 3 (a3-c3), respectively.

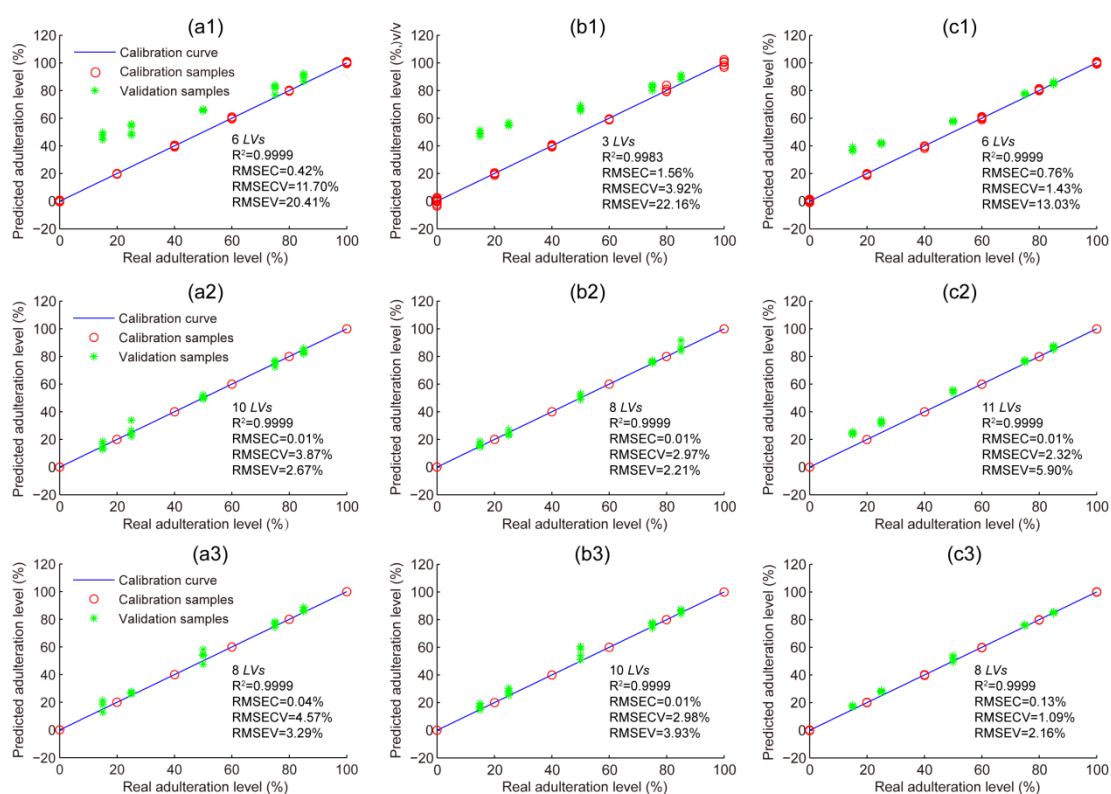

**Figure S3.** The plots of predicted adulteration levels versus real values obtained by PLS regression using first-order data collected at 380 nm (a1-a3), 440 nm (b1-b3) and first-order fusion data (c1-c3) in case4 (a1-c1), case 5 (a2-c2) and case 6 (a3-c3), respectively.

**Table S1.** The pungency degree, flavor and main origin of paprika samples studied.

| Variety                 | Pungency degree | Flavor    | Main origin                     |
|-------------------------|-----------------|-----------|---------------------------------|
| Erjingtiao              | ★ ★ ★           | ★ ★ ★ ★ ★ | Sichuan, Guizhou, Henan         |
| Lantern                 | ★ ★ ★           | ★ ★ ★ ★ ★ | Most provinces in China         |
| Bullet                  | ★ ★ ★ ★         | ★ ★ ★ ★   | Sichuan, Guizhou, Henan         |
| Xiaomi                  | ★ ★ ★ ★ ★       | ★ ★ ★     | Hunan, Yunnan, Guizhou, Sichuan |
| Pod                     | ★ ★ ★           | ★ ★ ★ ★   | Most provinces in China         |
| Wanzi                   | ★ ★ ★           | ★ ★ ★ ★   | Jinsha County, Guizhou          |
| Neihuang New Generation | ★ ★ ★ ★ ★       | ★ ★ ★ ★ ★ | Henan                           |

**Table S2.** Detailed sample information of the paprika samples analyzed in the study.

| Variety                 | Origin region | Number of samples |
|-------------------------|---------------|-------------------|
| Erjingtiao              | Sichuan       | 10                |
| Lantern                 | Guizhou       | 10                |
| Xiaomi                  | Guizhou       | 10                |
| Bullet                  | Guizhou       | 10                |
| Wanzi                   | Guizhou       | 10                |
| Erjingtiao              | Guizhou       | 6                 |
| Lantern                 | Henan         | 6                 |
| Neihuang New Generation | Henan         | 6                 |
| Bullet                  | Henan         | 6                 |
| Pod                     | Guizhou       | 6                 |
| <b>Total</b>            |               | <b>80</b>         |
